# Supplementary material
Source: Springer Nature journal article supplement (https://www.springermedizin.de/resource/supplementary/12911_2012_660_MOESM5_ESM.pdf/9526376)
Supplement: MOESM5 [file 9526376]

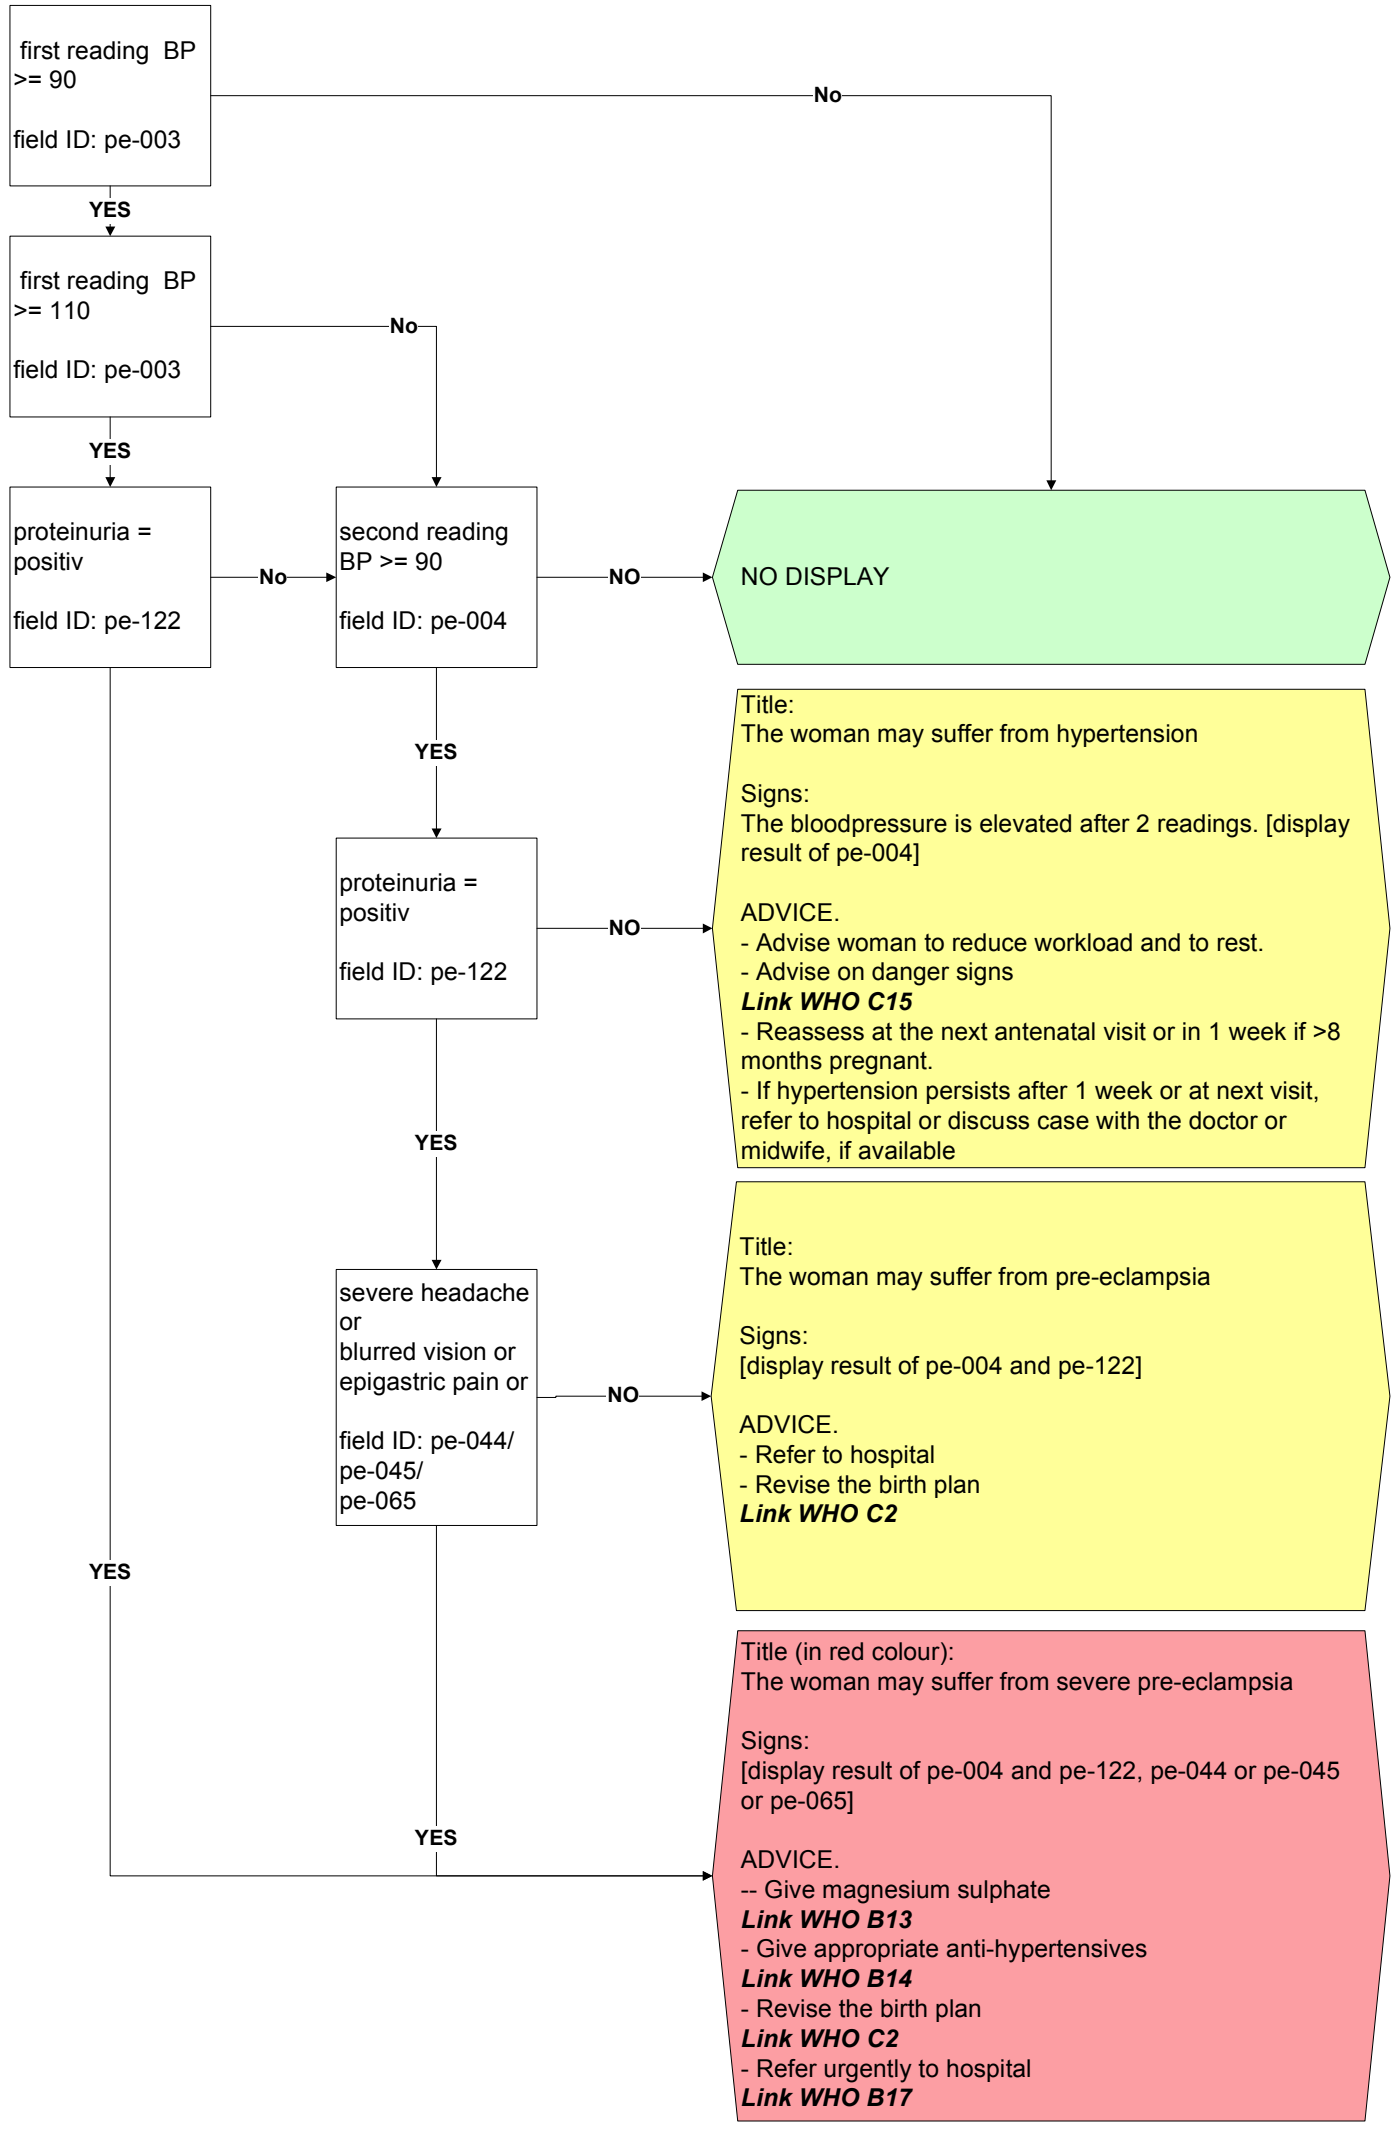

first reading BP  
>= 90  
field ID: pe-003

YES

first reading BP  
>= 110  
field ID: pe-003

YES

proteinuria =  
positiv  
field ID: pe-122

No

second reading  
BP >= 90  
field ID: pe-004

NO

NO DISPLAY

YES

proteinuria =  
positiv  
field ID: pe-122

NO

Title:  
The woman may suffer from hypertension  
Signs:  
The bloodpressure is elevated after 2 readings. [display result of pe-004]  
ADVICE.  
- Advise woman to reduce workload and to rest.  
- Advise on danger signs  
**Link WHO C15**  
- Reassess at the next antenatal visit or in 1 week if >8 months pregnant.  
- If hypertension persists after 1 week or at next visit, refer to hospital or discuss case with the doctor or midwife, if available

YES

severe headache  
or  
blurred vision or  
epigastric pain or  
field ID: pe-044/  
pe-045/  
pe-065

NO

Title:  
The woman may suffer from pre-eclampsia  
Signs:  
[display result of pe-004 and pe-122]  
ADVICE.  
- Refer to hospital  
- Revise the birth plan  
**Link WHO C2**

YES

YES

Title (in red colour):  
The woman may suffer from severe pre-eclampsia  
Signs:  
[display result of pe-004 and pe-122, pe-044 or pe-045 or pe-065]  
ADVICE.  
-- Give magnesium sulphate  
**Link WHO B13**  
- Give appropriate anti-hypertensives  
**Link WHO B14**  
- Revise the birth plan  
**Link WHO C2**  
- Refer urgently to hospital  
**Link WHO B17**
